# Supplementary material
Source: publisher site journal article supplement (https://www.spandidos-publications.com/8326/downloadSupplementary)
Supplement: Supplementary file 1 [file downloadSupplementary]

Table SI. Curcumin-based metabolites.

| Metabolites                                                                    | Molecular weight (g/mol) | Molecular formula                                | PubChem CID |
|--------------------------------------------------------------------------------|--------------------------|--------------------------------------------------|-------------|
| Curcumin                                                                       | 368.4                    | C <sub>21</sub> H <sub>20</sub> O <sub>6</sub>   | 969516      |
| Tetrahydrocurcumin                                                             | 372.4                    | C <sub>21</sub> H <sub>24</sub> O <sub>6</sub>   | 124072      |
| Demethoxycurcumin                                                              | 338.4                    | C <sub>20</sub> H <sub>18</sub> O <sub>5</sub>   | 5469424     |
| Bisdemethoxycurcumin                                                           | 308.3                    | C <sub>19</sub> H <sub>16</sub> O <sub>4</sub>   | 5315472     |
| (1E,4Z,6E)-5-hydroxy-1,7-bis(4-hydroxy-3-methoxyphenyl)hepta-1,4,6-trien-3-one | 368.4                    | C <sub>21</sub> H <sub>20</sub> O <sub>6</sub>   | 5281767     |
| Monodemethylcurcumin                                                           | 354.4                    | C <sub>20</sub> H <sub>18</sub> O <sub>6</sub>   | 5469426     |
| Curcumin sulfate                                                               | 448.4                    | C <sub>21</sub> H <sub>20</sub> O <sub>9</sub> S | 66645351    |
| Curcumin glucuronide                                                           | 544.5                    | C <sub>27</sub> H <sub>28</sub> O <sub>12</sub>  | 71315012    |
| Curcumin diglucoside                                                           | 544.5                    | C <sub>33</sub> H <sub>40</sub> O <sub>16</sub>  | 46173989    |
| Curcumin monoglucoside                                                         | 692.7                    | C <sub>33</sub> H <sub>40</sub> O <sub>16</sub>  | 11526601    |
| Curcumin 4'-O-beta-D-gentiobioside                                             | 530.5                    | C <sub>27</sub> H <sub>30</sub> O <sub>11</sub>  | 46926100    |
| Curcumin dimer 1                                                               | 692.7                    | C <sub>33</sub> H <sub>40</sub> O <sub>16</sub>  | 100972288   |
| Curcumin dimer 3                                                               | 734.7                    | C <sub>42</sub> H <sub>38</sub> O <sub>12</sub>  | 131752651   |

Table SII. Curcumin and its therapeutic effects in various disease models.

| Activity          | Disease model                 | <i>In vitro</i> and concentration                   | <i>In vivo</i> and dose                                                    | Effects                                                                                                              | (Refs.) <sup>a</sup> |
|-------------------|-------------------------------|-----------------------------------------------------|----------------------------------------------------------------------------|----------------------------------------------------------------------------------------------------------------------|----------------------|
| Anti-inflammatory | Inflammatory diseases         | RAW 264.7 macrophages (1 to 10 $\mu$ M)             | C57BL/6 mice                                                               | Curcumin analogs produced from $\beta$ -ionone have potential applications as anti-inflammatory medicines.           | (63)                 |
|                   | Acute lung injury             | HUVECs, RAW 264.7 (1 to 10 $\mu$ M)                 | C57BL/6 (10 mg/kg) and Sprague-Dawley rats (20 mg/kg)                      | Analogues of curcumin may be used to treat inflammatory conditions.                                                  | (62)                 |
|                   | Sepsis                        | Mouse macrophages RAW 264.7 (10, 20, or 40 $\mu$ M) | Not performed                                                              | Because FM0807 exhibits anti-inflammatory properties in vitro, there may be a clinical application for it in sepsis. | (63)                 |
|                   | LPS-induced sepsis            | Human THP-1 (0.25 to 4 $\mu$ M)                     | C57BL/6 mice (1, 3, or 10 mg/kg)                                           | NLRP3 inflammasome-driven disorders, such as sepsis, may benefit from the use of I-44 as a potential treatment.      | (64)                 |
|                   | Sepsis                        | RAW 264.7 macrophages (5 $\mu$ M CLEN)              | Balb/c mice (50 mg/kg <i>C. longa</i> -extract loaded nanoemulsion (CLEN)) | Treatment for endotoxemia may benefit from <i>C. longa</i> 's ability to inhibit the synthesis of HMGB1.             | (65)                 |
|                   | Inflammation-related diseases | RAW 264.7 macrophages                               | C57BL/6 mice (20 mg/kg)                                                    | Curcumin can reduce inflammation brought on by LPS.                                                                  | (95)                 |

|                  |                                      |                                                                                                      |                                            |                                                                                                                                            |      |
|------------------|--------------------------------------|------------------------------------------------------------------------------------------------------|--------------------------------------------|--------------------------------------------------------------------------------------------------------------------------------------------|------|
|                  | (sepsis)                             | (5, 10, and 15 $\mu$ M)                                                                              |                                            |                                                                                                                                            |      |
|                  | Acute liver failure                  | Hepatic stellate cells (0.5 to 2 $\mu$ M)                                                            | C57BL/6 mice (20,40, and 80 mg/kg)         | In therapeutic settings, curcumin may be utilized to treat inflammatory diseases like sepsis.                                              | (66) |
| Immunomodulatory | Sepsis and leukemia                  | THP-1, HL-60, MCF-7, and MDA-MB-231 (1-10 $\mu$ M for THP-1 cells and 1-100 $\mu$ M for other cells) | Swiss albino mice (30, 100, and 300 mg/kg) | Sepsis can be efficiently treated with curcumin because it regulates the immune response.                                                  | (67) |
|                  | CLP-induced sepsis                   | U937 cells                                                                                           | ICR mice (1 and 10 mg/kg)                  | The effectiveness of curcumin analog BHMC in avoiding death after deadly sepsis may be attributed to its increased potency to inhibit p38. | (68) |
|                  | Microvascular dysfunction            | Not performed                                                                                        | C57BL/6 mice (100 mg/kg)                   | In CLP, curcumin reduces immune system dysfunction                                                                                         | (96) |
|                  | Acute lung injury (ALI)              | Human pulmonary epithelial cells (1, 5, and 10 $\mu$ M)                                              | Sprague-Dawley rats (20 mg/kg/day)         | Curcumin analog (c26) protects septic mice against LPS-induced ALI in a potent manner.                                                     | (69) |
|                  | Septic shock and NLRP3 inflammasome- | J774A.1 cells (50 $\mu$ M)                                                                           | C57BL/6 mice (2mg)                         | Curcumin has the potential to treat septic shock because it prevents the NLRP3 inflammasome from activating.                               | (70) |

|                                                                                                                                          |                             |                                                       |                                |                                                                                                                                |      |
|------------------------------------------------------------------------------------------------------------------------------------------|-----------------------------|-------------------------------------------------------|--------------------------------|--------------------------------------------------------------------------------------------------------------------------------|------|
|                                                                                                                                          | driven diseases             |                                                       |                                |                                                                                                                                |      |
|                                                                                                                                          | Sepsis                      | Mouse primary peritoneal macrophage (2.5 to 20 µg/ml) | C57BL/6 mice (10 mg/kg)        | A curcumin analog might be created as a possible mediator for the management of sepsis.                                        | (71) |
|                                                                                                                                          | Gram-negative sepsis        | J774 macrophages, HepG2 (0-3 mg/l)                    | Balb/c mice (10 and 20 mg/kg)  | Curcumin may be a suitable interventional strategy for the management of sepsis and related excessive-inflammatory conditions. | (72) |
| Antioxidant                                                                                                                              | Sepsis                      | RAW 264.7, HepG2, HEK-2936 (1.5 and 3 mg/l)           | Sprague-Dawley rats (10 mg/kg) | Curcumin may lessen tissue oxidative damage.                                                                                   | (73) |
|                                                                                                                                          | Acute inflammatory diseases | Mouse macrophages and HL-7702 cells (1 to 5 µM)       | C57BL/6 mice (10 mg/kg)        | Curcumin analogues are beneficial in treating inflammatory illnesses.                                                          | (74) |
|                                                                                                                                          | LPS-induced sepsis          | RAW 264.7 (1 to 10 µM)                                | C57BL/6 mice (20 mg/kg)        | Curcumin analogues are anti-inflammatory drugs.                                                                                | (75) |
| <sup>a</sup> Referenece citations pertain to the reference list in the main manuscript. LPS, lipopolysaccharide; ALI, acute lung injury. |                             |                                                       |                                |                                                                                                                                |      |

Table SIII. Effects of curcumin on Gram-negative and Gram-positive bacteria.

| Bacteria                                                                                               | Concentration used                         | Main findings                                                                                                                                                   | Techniques used<br>(disc diffusion/well diffusion/broth dilution) | (Refs.) <sup>a</sup> |
|--------------------------------------------------------------------------------------------------------|--------------------------------------------|-----------------------------------------------------------------------------------------------------------------------------------------------------------------|-------------------------------------------------------------------|----------------------|
| <i>S. aureus</i> ; <i>E. coli</i> ;<br><i>Enterococcus faecalis</i> ;<br><i>Pseudomonas aeruginosa</i> | 25 $\mu$ M, 50 $\mu$ M,<br>and 100 $\mu$ M | Demonstrated antibacterial activity by damaging the membrane.                                                                                                   | Brain heart infusion (BHI) broth dilution method                  | (81)                 |
| <i>Streptococcus mutants</i>                                                                           | 5 mg/ml                                    | Reduced adhesion of <i>S. mutants</i> to dental surfaces, including extracellular matrix proteins                                                               | Brain heart infusion (BHI) broth dilution method                  | (82)                 |
| <i>Acinetobacter baumannii</i>                                                                         | 256-0.5 $\mu$ g/ml                         | Curcumin in combination with epigallocatechin gallate (EGCG) showed antimicrobial activity against MDR <i>A. baumannii</i> .                                    | Standard broth microdilution method                               | (83)                 |
| <i>MRSA</i>                                                                                            | 125 to 250 g/ml                            | Curcumin demonstrated antibacterial activity against MRSA by lowering the MICs of tested drugs, including ampicillin, ciprofloxacin, norfloxacin and oxacillin. | Standard broth microdilution method                               | (84)                 |

|                                                      |                   |                                                                                                                                                 |                                                  |      |
|------------------------------------------------------|-------------------|-------------------------------------------------------------------------------------------------------------------------------------------------|--------------------------------------------------|------|
| <i>Porphyromonas gingivalis</i> , <i>S. gordonii</i> | 100 µg/ml         | Curcumin demonstrated antibacterial activity by inhibiting the biofilm formation of <i>Porphyromonas gingivalis</i> and <i>S. gordonii</i> .    | Broth microdilution method                       | (85) |
| <i>S. aureus</i>                                     | 2 to 16 µg/ml     | Curcumin protected mice infected with MRSA (methicillin-resistant strains) by inhibiting the pore-forming action of $\alpha$ -hemolysin.        | Broth microdilution method                       | (86) |
| <i>Helicobacter pylori</i>                           | 5 g/ml to 50 g/ml | Curcumin blocked the growth of <i>H. pylori</i> and ameliorated the <i>H. pylori</i> -induced gastric damage.                                   | Brain heart infusion (BHI) broth dilution method | (87) |
| <i>E. coli</i>                                       | 12 µg/ml          | Curcumin restrained the growth of <i>E. coli</i> by displaying apoptotic markers, including ROS, membrane depolarization, and $Ca^{2+}$ influx. | Broth microdilution method                       | (88) |
| <i>P. aeruginosa</i>                                 | 1 mg/ml           | Curcumin in combination with gentamicin and azithromycin showed synergistic effects against <i>P. aeruginosa</i> quorum-sensing systems.        | Broth microdilution method                       | (29) |

|                                                                                        |            |                                                                                                                                            |                            |      |
|----------------------------------------------------------------------------------------|------------|--------------------------------------------------------------------------------------------------------------------------------------------|----------------------------|------|
| <i>Salmonella typhimurium</i>                                                          | 20 $\mu$ M | Curcumin demonstrated antibacterial activity by adhering and making it prone to breaking into smaller fragments in <i>S. typhimurium</i> . | Broth microdilution method | (89) |
| <i>E. coli</i>                                                                         | >16 g/ml   | Levofloxacin-induced SOS reaction in <i>E. coli</i> is inhibited by curcumin.                                                              | Well diffusion method      | (90) |
| <sup>a</sup> Refernece citations pertain to the reference list in the main manuscript. |            |                                                                                                                                            |                            |      |

Table SIV. Organ-protective potential effects of curcumin.

| Activity        | Disease model     | <i>In vitro</i> ;<br><i>In vivo</i> (dose and type<br>of administration) | Duration of study                             | Main findings                                                                                 | (Refs.) <sup>a</sup> |
|-----------------|-------------------|--------------------------------------------------------------------------|-----------------------------------------------|-----------------------------------------------------------------------------------------------|----------------------|
| Lung protection | Acute lung injury | EA. hy926 (10 and 30 $\mu$ M); C57BL/6J mice (30 mg/kg, i.p.)            | 2 h before LPS injection. 15 min/day for cell | Lung damage caused by sepsis may benefit from the use of curcumin and its derivatives.        | (110)                |
|                 | Acute lung injury | Balb/c mice (10 mg/kg, i.n.)                                             | Single dose After 24 h of intranasal LPS      | Curcumin offered protection from sudden acute lung damage.                                    | (111)                |
|                 | Acute lung injury | Sprague-Dawley (SD) rats (42 mg/kg, i.p.)                                | Single dose, 4 and 12 h after CLP             | Curcumin can alleviate acute lung injury and enhance survival                                 | (112)                |
|                 | Acute lung injury | SD rats (50 or 200 mg/kg, i.p.)                                          | At 2 h post-CLP                               | Curcumin can guard against ALI brought on by CLP.                                             | (124)                |
|                 | Acute lung injury | SD rats (200 mg/kg/day, i.p.)                                            | 24 h after                                    | Curcumin protected ALI brought on by sepsis.                                                  | (59)                 |
|                 | Lung injury, ARDS | Swiss albino mice (20 mg/kg, i.p., and 10 mg/kg, i.n.)                   | Single dose, 1, 6, 24, and 72 h               | Early in the course of endotoxemia, curcumin can be utilized as a supplementary intervention. | (97)                 |

|                  |                                                                   |                                                                                      |                                          |                                                                                                                   |       |
|------------------|-------------------------------------------------------------------|--------------------------------------------------------------------------------------|------------------------------------------|-------------------------------------------------------------------------------------------------------------------|-------|
|                  | Chronic lung injury                                               | Male albino rats (50 and 100 mg/kg bwt, orally)                                      | Consecutive 45 days                      | Curcumin exhibits therapeutic properties against CLP-induced CLI.                                                 | (98)  |
|                  | Septic lung injury                                                | Bone marrow-derived macrophages (BMDM) (10 $\mu$ M); C57BL/6J mice (200 mg/kg, i.p.) | Single Dose for 4hr ( <i>in vitro</i> )  | Septic lung damage and other inflammatory diseases are inhibited by curcumin.                                     | (113) |
| Cardioprotective | Vascular dysfunction                                              | ICR mice (50 or 100 mg/kg)                                                           | 3 hr before LPS administration; for 15 h | Curcumin has demonstrated efficacy in treating vascular dysfunction in mice exhibiting endotoxemia induced by LPS | (114) |
|                  | Vasoconstrictive dysfunction                                      | SD rats (10 or 20 mg/kg, i.p.)                                                       | 24 h                                     | Curcumin relieved aortic media and intima damage and restored vasoconstrictive function.                          | (115) |
|                  | Myocardial injury                                                 | SD rats (200 mg/kg/d, i.p.)                                                          | 3 Days                                   | Curcumin improves fractional shortening, ejection fraction and cardiac function.                                  | (107) |
|                  | Sepsis-induced acute organ dysfunction/inflammatory tissue injury | Balb/c mice (50, 100, and 200 mg/kg)                                                 | 12 h after CLP                           | Curcumin inhibits TNF- $\alpha$ and IL-6 in septic mice and improves survival after CLP.                          | (116) |

|                  |                                   |                                                                                             |                                             |                                                                                                                                  |       |
|------------------|-----------------------------------|---------------------------------------------------------------------------------------------|---------------------------------------------|----------------------------------------------------------------------------------------------------------------------------------|-------|
|                  | Hypoglycaemia and hypovolemia     | Wistar rats (100 mg/kg, p.o.)                                                               | 7 days before CLP and 2 h after surgery     | The dosage of curcumin dispersion reduced sepsis complications.                                                                  | (117) |
|                  | Lipopolysaccharide-induced sepsis | IL-1b transgenic mice (30 mg/kg, i.p.)                                                      | 30 min before LPS                           | Curcumin loaded lipid nanoparticles have the potential to be a safe and effective therapeutic agent for the treatment of sepsis. | (44)  |
| Hepatoprotective | Hepatocyte injury                 | Wistar rats (50 and 100 mg/kg, i.p.)                                                        | Single dose for 7 days                      | Liver function was shielded by curcumin.                                                                                         | (118) |
|                  | Acute liver failure (ALF)         | Hepatic stellate cells (HSCs) (0.5, 1 and 2 mM); C57BL/6 mice (20, 40 and 80 mg/kg, orally) | After 24 h for 4 weeks                      | Curcumin alleviates liver injury.                                                                                                | (66)  |
|                  | Acute liver injury                | Balb/c mice (100 mg/kg, i.p.)                                                               | 3 hr before LPS/GalN                        | Curcumin attenuates LPS-induced hepatic injury.                                                                                  | (119) |
|                  | Hepatorenal oxidative injury      | Wistar Albino rats (200 mg/kg, i.p.)                                                        | After perforation and 12 h post-perforation | Curcumin has potent anti-inflammatory and antioxidant properties.                                                                | (125) |
| Renoprotective   | Chronic inflammatory diseases     | 293 (0 to 10 $\mu$ M)                                                                       | 1 h before stimulation with LPS             | Curcumin, a novel inhibitor that selectively binds to MD2, is and                                                                | (120) |

|                                                         |                                                                                        |                                                        |                                                                                                                                                |                                             |  |
|---------------------------------------------------------|----------------------------------------------------------------------------------------|--------------------------------------------------------|------------------------------------------------------------------------------------------------------------------------------------------------|---------------------------------------------|--|
|                                                         |                                                                                        |                                                        |                                                                                                                                                | potential therapy for bacterial infections. |  |
| Disseminated intravascular coagulation and renal injury | SD rats (60 mg/kg bwt, i.p.)                                                           | Single dose, 3 hr before LPS infusion                  | Curcumin prevents fibrin deposition in the glomeruli of the kidney.                                                                            | (121)                                       |  |
| Septic acute kidney injury (SAKI)                       | C57BL/6 mice (50, 100, 200 mg/kg)                                                      | Before LPS injection, i.p., for 24 h                   | Curcumin reduces kidney damage and levels of creatinine, cystatin C, and blood urea nitrogen in serum, and attenuates PVT1 expression in mice. | (93)                                        |  |
| Septic acute kidney injury                              | Human kidney-2 cells (0, 5, 10 and 20 $\mu$ mol/l); C57 mice (100 and 200 mg/kg, i.p.) | 12 hr for cells; 24 h for mice                         | Curcumin attenuates SAKI by blocking NF- $\kappa$ B and JAK2/STAT3 signaling pathways.                                                         | (122)                                       |  |
| Septic acute kidney injury                              | Male SD rats (100 mg/kg, i.p.)                                                         | 12 hr and 24 h (single dose immediately after surgery) | Curcumin reduces AKI in rats by improving renal microcirculatory perfusion.                                                                    | (123)                                       |  |
| Acute tubular necrosis                                  | Albino Wistar rats (1.2 g/kg, i.p.)                                                    | 7 Days                                                 | Curcumin helps in treating organ failure in sepsis.                                                                                            | (99)                                        |  |

|                 |                                                           |                                 |                                            |                                                                                                                                 |       |
|-----------------|-----------------------------------------------------------|---------------------------------|--------------------------------------------|---------------------------------------------------------------------------------------------------------------------------------|-------|
| Neuroprotective | Cerebral mitochondrial dysfunction or septic brain injury | C57BL/6J mice (100 mg/kg, i.p.) | Single dose, 3, 12, and 24 h after surgery | Curcumin enhances survival rate, reduces brain edema, increases BBB integrity, reduces apoptosis and mitochondrial dysfunction. | (105) |
|-----------------|-----------------------------------------------------------|---------------------------------|--------------------------------------------|---------------------------------------------------------------------------------------------------------------------------------|-------|

<sup>a</sup>Referenece citations pertain to the reference list in the main manuscript. LPS, lipopolysaccharide; CLP, cecal ligation/puncture; ARDS, acute respiratory distress syndrome; CLI, chronic lung injury; AKI, acute kidney injury.
